# Supplementary material for: Cell-lineage controlled epigenetic regulation in glioblastoma stem cells determines functionally distinct subgroups and predicts patient survival
Source: PubMed Central journal article supplement (PMC9038925; doi:10.1038/s41467-022-29912-2), 2022-04-25
Supplement: 41467_2022_29912_MOESM2_ESM.pdf [file 41467_2022_29912_MOESM2_ESM.pdf]

## Peer Review File

---

Cell-lineage controlled epigenetic regulation in glioblastoma stem cells determines functionally distinct subgroups and predicts patient survival

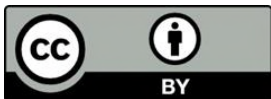

**Open Access** This file is licensed under a Creative Commons Attribution 4.0

International License, which permits use, sharing, adaptation, distribution and reproduction in any medium or format, as long as you give appropriate credit to

the original author(s) and the source, provide a link to the Creative Commons license, and indicate if changes were made. In the cases where the authors are anonymous, such as is the case for the reports of anonymous peer reviewers, author attribution should be to 'Anonymous Referee' followed by a clear attribution to the source work. The images or other third party material in this file are included in the article's Creative Commons license, unless indicated otherwise in a credit line to the material. If material is not included in the article's Creative Commons license and your intended use is not permitted by statutory regulation or exceeds the permitted use, you will need to obtain permission directly from the copyright holder. To view a copy of this license, visit <http://creativecommons.org/licenses/by/4.0/>.

## Reviewers' Comments:

### Reviewer #2:

#### Remarks to the Author:

In the manuscript by Lu et al. the authors performed a cross-species epigenome analysis of mouse and human GSC cultures. The authors analyzed and compared the chromatin-accessibility landscape of nine mouse GSC cultures of defined cell of origin and used sixty patient-derived GSC cultures by assay for transposase-accessible chromatin using sequencing (ATAC-seq). The authors have claimed to have uncovered a variability of both mouse and human GSC cultures that was different from transcriptome analysis and better at predicting functional subgroups.

#### Major Criticism:

1) Starting with the ATAC method, they used formaldehyde to fix it and then reverse crosslink it after tagmentation which is something the communicating author used in a previous ATAC-seq paper. For ATAC-seq I believe the need to fix the cell due to fluorescent staining and visualization afterward, but here they are only using those tissues for bulk ATAC, therefore, what's the precise reasoning for doing the formaldehyde crosslinking. Even if the authors claim using their method wouldn't change the ATAC profile, most in the field still prefer the option of capturing the chromatin in its native state without any crosslinking. Then why is there any need to use this method? It seems to create problems and raises concerns.

2) This reader doesn't really understand the need for including the mouse data as an aspect of the study for Figure 1 and should remove this to strengthen the authors' rationale. This data appears to detract from their observations in the first figure of the manuscript. The authors used cells from three different origins (used in triplicate representing 9 cell lines) and performed bulk ATAC. One would predict that cells from different origins should definitely cluster well together, and what was presented in Supplementary Fig. 1C basically represents a problem using the triplicate or poor-quality reads. While it is totally understandable since it's from different mice and only 3 in each group can result in huge variation observed. The authors should either remove the outliers and increase the number in each group to see if the PCA clustering improves.

Figure as Supp1B basically shows no significant clustering between those SCXX samples by Pearson correlation, but they switch to NMF method to make it look more significant in Figure 1d. In Figure 1C, the authors argue the peaks are specific to different origins, but in fact they are also trying to split replicates of each origin and mix them in groupings based on the NMF clustering.

Through Figures 1E and 1F is basically regarded as hacking the statistical analysis to fit their proposed model. A knowledgeable reader would say they could see a clear trend in Figure 1F between those different origins, even though they are not significant in p values, as well as shown in Figure 1E, the authors just switched some of the samples to fit it as statistically significant even though these two figures resemble each other. This is a problem in the reader's view.

In Figure 1G the authors only displayed their new grouping to show some survival differences. This then questions how does one explain about the difference survival analysis of the origins then? That too is also likely different and maybe more significant than the authors' original intent.

Found in Figure 1G are TFs the authors selected from Figure 1i, which is presumed to yield a difference in binding judging from the heatmap, but their plot showed quite the opposite. Most knowledgeable readers would not regard these binding differently as this is acknowledged merely by the insignificant p values.

3) For addressing the human analysis, the number of samples used and data itself are truly valuable, and capturing brain tissue is not an easy task, so there is strong appreciation for what was needed for

them to generate those datasets, the QC looks OK, but this too still widely varies between samples used. This is understandable since patient variability and their collecting at different times by different personnel may represent the inconsistencies in some of the QC standards. The variation in TSS enrichment and Frip scores would lead to the wide variation in percent of promoter and enhancer peaks, where this is likely due to their technical inconsistencies with this difficult tissue type, but this aspect should not be listed as a biological difference and the focus in Figure 3. (Figure 3, panels f,g,h doesn't provide much real information). This questions the value in using this information. Figure 4, panels a,c,d is still question those distribution differences by ATAC peaks shown, even though called "significant" there is not much difference by eye, and this too could be due to technical variation. The authors used the same NMF clustering 50 human samples which doesn't correlate well with TCGA subtypes and mildly correlate with MCO scoring. What the authors claimed is their ATAC is yields a better predictive value and can capture sample difference that can't be found in the RNA-seq results, this is not believable based on the data presented thus far. From what we know, RNA-seq has less technical variation and should be more robust to present sample differences. Whatever marks survival, whether through sphere growth or differences in drug response, this reader believes you can find a similar trend using any other random grouping method that wouldn't carry any significant biological meaning. The way the authors are trying data mining with the data shown that doesn't not cluster well with real subtypes is problematic. If their 50 patients NMF clusters matches poorly with TCGA data, then this too is a problem. The authors are effectively claiming their datasets are better predictor than all the TCGA data combined. If by comparison the authors would need much more experimental and clinical data to back up their claims for the groupings shown. A reader would have argued that the authors should have focused more on the MCO score correlation and strengthen a story around that concept, where at the very minimum this would at least show readers that ATAC-seq data can be used to evaluate/correlate with MCO and find strong biological relationships more effectively, at least some of the TF activity in Figure 4h does look difference, or do a integrate RNA and ATAC analysis using MCO grouped RNA-data with their ATAC data and see how the different MCO group glioblastoma regulome works, that would be more interesting than those promoter and enhancer percentage QC and correlation analysis.

Overall evaluation is that the authors would at the very least need a major revision and to rethink about what and how they want to analyze this truly valuable dataset. What they are claiming now remains arbitrary and is weak without further biological and clinical data to back up their findings and observations.

Reviewer #3:

Remarks to the Author:

In the manuscript 'Conserved cell-lineage controlled epigenetic regulation in human and mouse glioblastoma stem cells determines functionally distinct subgroups', Lu et al. describe a novel approach for classifying GSC cultures based on transposase-accessible chromatin distribution. They identified three independent ATAC-seq clusters in 9 murine and 60 human GSC cultures that were different compared to gene expression-driven approaches. In their mouse model, they found functional differences in sphere-forming capacity, in vivo aggressiveness, drug response, and transcription factor motifs in the ATACs. They further went on performing similar experiments with human GSC cultures. The sequences were predominantly DREs in both species. Also, in the human system, they report functional differences between the clusters in terms of GSC clonogenicity and drug response. The human ATAC-seq clusters overlapped with the MCO stratification better when compared to the murine GSCs. Importantly, individuals belonging to two clusters showed significantly different survival in a small cohort of patients. Finally, they analyzed the TF motifs in the murine and human GSC ATAC-seq samples and found a significant overlap of these motifs.

The manuscript is well written and describes an in-depth analysis of ATAC-seq data obtained from a big collection of GSC cultures and shows that the patients can be clearly divided into well-defined clusters with this method. However, it is a retrospective study with few biologically functional data. Thus, the practical value of this approach in the classification of GB over the current gene expression-driven methods is not entirely evident.

Major points:

1) In the mouse model (figure 1), the authors use ATAC-seq to divide the GSC cultures into three distinct and clearly separated clusters. Then they use this scheme to perform their first functional tests (e-h) to later unite clusters A and B in Figures i and j. This seems a bit forced. If the authors suggest ATAC-seq as the basis for grouping the GSC cultures and three clear ATAC-seq clusters were identified, the differences within these three clusters should be analyzed. Given the investigation's retrospective nature, this grouping should not be changed depending on the experimental question to be answered.

2) In the sphere-forming assay (figure 1e and f), the behavior of the murine GSC cultures grouped by MCO and ATAC-seq are compared. The analyses show only differences for the ATAC-seq clusters. The authors describe that the system of murine GSCs was published before (Cell Reports 18, 977–990, January 24, 2017). How can it be explained that a similar analysis done in the cited paper showed highly significant differences between mGC1(GFAP) and mGC2(NES) or mGC3(CNP), while the new analyses did not?

3) Critics concerning data selection apply to the data obtained for the human GSC samples. In figure 2, the authors describe the identification of robust clusters with 60 GSC samples (ATAC60). It is not entirely clear why they remove 10 samples for further analyses. In the text, this procedure is explained by the lack of genetic data for the 10 lacking samples but with such a strong bioinformatic background these analyses should be possible and done.

4) While the xenograft data in figure 6 is convincingly showing that mice injected with human GSCs belonging to different ATAC-seq clusters have different survival rates, the patient data is not so strong. This may be at least partially due to the low number of patients. It may be helpful to include the patients for the ATAC60 panel to strengthen the significance (this could even be done without further information concerning the gene expression profiling). Especially because the different survival between two clusters is also underlined in the abstract.

5) The reviewer has not fully understood the discrepancy of the temozolomide sensitivity measured in Figures 6f and 5 e-g. If these differences are too subtle to be detected in AUC analyses, it may be enough to explain the discrepancies for the survival in the mouse model and the patients. The authors may test their hypothesis in vivo for some of their cultures to better mimic the patients' situation.

6) The finding that murine and human GSC ATAC clusters are largely overlapping is very interesting but may be biased by the growth conditions. The GSC cultures are established and kept in defined media with dominant growth factors (FGF2 and EGF). These could lead to the activation of selected signaling pathways in both murine and human GSCs that, in turn, may result in the activation of similar transcription factor patterns. This should be investigated carefully because TFs of the AP1 family are downstream substrates of MAP kinases that are known to be strongly activated by growth factor signaling. Thus, the authors may control if the culture conditions influence the ATAC-seq data.

Minor points:

1) From the M+M part, it is not clear how the sphere formation assay was done. Were the primary spheres established from in vitro cultures or from freshly dissociated xenografts? If they were established from in vitro cultures (which could explain the identical rates of primary, secondary, and tertiary spheres), it is a bit misleading to describe them as primary spheres. In this case, it would be better to rate it as in vitro proliferation.

2) The same question applies to the ELDA and the proliferation analyses. Were the cells from freshly dissociated tumors or from GSC in vitro cultures?

3) For the survival analyses in figure 6a, the mice were inoculated with different numbers of cells. Although this becomes evident from the supplementary table, it should be clearly stated in the text.

1 **Overview:**  
2

3 We are grateful to the reviewers for taking their time to evaluate our work and providing  
4 constructive comments and valid critique. We have found them very helpful to identify  
5 weaknesses and unclarities of our manuscript and have considered them carefully. Below  
6 you can find, point-by-point how we have addressed and responded to them. By doing so we  
7 think that the revised manuscript has been greatly improved.  
8

9 The main changes in the revised manuscript are:  
10

11 **i)** A major concern raised by both reviewers was that the mouse GSC (mGSC) ATAC-seq  
12 clusters did not produce cell of origin groups. Reviewer 2 suggested that this could have  
13 been a consequence of the ATAC-seq data quality. To prove that comment right or wrong we  
14 re-analyzed the nine mGSC cultures with Omni-ATAC-seq (*Corces R et al, Nat Methods,*  
15 *2017, PMID: 28846090*). This method has been shown to enhance the signal-to-background  
16 ratio and produce high-quality chromatin-accessibility data. The new mGSC ATAC-seq data  
17 was of substantially higher quality and lower variability compared with the previous mGSC  
18 data, as shown below in **Response 2.3** and **Response fig. 1**, and when we analyzed the  
19 new data with PCA we found that mGSC cultures of the same cell of origin clustered  
20 together, in alignment with the cluster analysis of transcriptome data of the same mGSC  
21 cultures (*Jiang Y et al, Cell Rep, 2017, PMID: 28122246*). We have exchanged the previous  
22 mouse ATAC-seq data with the new Omni-ATAC-seq data in the revised version of the  
23 manuscript, and have re-analyzed all figures affected by that (**Fig. 1; Fig. S1; Fig. 7; Fig.**  
24 **S7**). Importantly, we have not done this because the new data generated cell of origin  
25 clusters but because of its substantially higher quality.  
26

27 **ii)** The new mGSC groups showed a higher cross-species molecular connection with the  
28 human GSC (hGSC) ATAC50 clusters. We had previously shown that the mGSC  
29 transcriptome groups clustered with proneural (mGC1<sub>GFAP</sub>, mGC3<sub>CNP</sub>) or mesenchymal  
30 (mGC2<sub>NES</sub>) glioblastoma (*Jiang Y et al, Cell Rep, 2017*). This was now corroborated by  
31 analyses of genes (**Fig. 1e**) and TF motifs enrichments (**Fig. 1g; Fig. S1g-i**) of the unique  
32 ATAC peaks for each mGSC group, and a new cross-species analysis of enriched TF motifs  
33 in unique mouse and human ATAC peaks showed a positive correlation between mGC1<sub>GFAP</sub>-  
34 C1, mGC3<sub>CNP</sub>-C3 and mGC2<sub>NES</sub>-C2 (**Fig. S7a**), which in all supported an alignment along a  
35 proneural (mGC1<sub>GFAP</sub>) to mesenchymal (mGC2<sub>NES</sub>) axis with mGC3<sub>CNP</sub> in between.  
36

37 **iii)** A comment from reviewer 2 made us realize that we did not show the functional data of  
38 hGSC cultures (**Fig. 5; Fig. 6a**) based on TCGA groups in the previous manuscript, which  
39 we agree would be a relevant comparison to our ATAC50 groups. As outlined in **Response**  
40 **2.14** below we have therefore included the results of the functional analyses based on TCGA  
41 subtypes (**Fig. S6; Fig. 6b**). This provides further support for that the ATAC50-based  
42 grouping more accurately predicts functional responses such as self-renewal, invasion, drug  
43 sensitivity and tumorigenicity of the patient-derived GSCs.  
44

45 **iv)** Both reviewers proposed to include more clinical data in our study, which we agree would  
46 be beneficial but in practice is not an easy task. To address this we used the most obvious  
47 and straightforward approach which was to include survival data for all glioblastoma patients.  
48 They were stratified based on the ATAC60 clusters, which had showed a very high overlap  
49 with ATAC50, and by adding ten more patients the ATAC stratification produced a strong  
50 significant survival difference between C2 and C3 patients (**Fig. 6f**).  
51  
52  
53

54 **Point-by-point responses to reviewers' comments**

55  
56 **Reviewer #2, expert in ATAC-seq (Remarks to the Author):**

57  
58 We thank R2 for thought-provoking and constructive comments. We have tried our best to  
59 address and respond to them and have revised the manuscript accordingly.

60  
61 In the manuscript by Lu et al. the authors performed a cross-species epigenome analysis of  
62 mouse and human GSC cultures. The authors analyzed and compared the chromatin-  
63 accessibility landscape of nine mouse GSC cultures of defined cell of origin and used sixty  
64 patient-derived GSC cultures by assay for transposase-accessible chromatin using  
65 sequencing (ATAC-seq). The authrs have claimed to have uncovered a variability of both  
66 mouse and human GSC cultures that was different from transcriptome analysis and better at  
67 predicting functional subgroups.

68  
69 Major Criticism:

70 1) Starting with the ATAC method, they used formaldehyde to fix it and then reverse  
71 crosslink it after tagmentation which is something the communicating author used in a  
72 previous ATAC-see paper. For ATAC-see I believe the need to fix the cell due to fluorescent  
73 staining and visualization afterward, but here they are only using those tissue for bulk ATAC,  
74 therefore, what's the precise reasoning for doing the formaldehyde crosslinking. Even if the  
75 authors claim using their method wouldn't change the ATAC profile, most in the field still  
76 prefer the option of capturing the chromatin in its native state without any crosslinking. Then  
77 why is there any need to use this method? It seems to creat problems and raises concerns.

78  
79 **2.1.** We can understand this concern but we have previously shown that mild formaldehyde  
80 treatment does not change the chromatin profiles of cultured cells (*Chen X et al, Nat Meth,*  
81 *2016, PMID: 27749837*). The reason for using crosslinking in our study was to reduce  
82 technical bias between the samples. In this way we could harvest cells at different time  
83 points, since it was not possible to maintain and prepare 60 cultures at the same time. In  
84 addition, two independent studies have also showed that mild formaldehyde fixation does not  
85 interfere with tagmentation (*Payne A et al, Science, 2021, PMID: 22284301; Cusanovich D et*  
86 *al, Nature, PMID: 29539636*). Taken together, we believe it is reasonable to perform ATAC-  
87 seq with mild formaldehyde fixation.

88  
89 2) This reader doesn't really understand the need for including the mouse data as aspect of  
90 the study for Figure 1 and should remove this to strengthen the authors' rationales.

91  
92 **2.2.** This is an important point which made us aware of the need to better describe the  
93 rationale of our study. It builds on our previous cross-species transcriptome investigation  
94 where we showed that a mouse cell-of-origin (MCO) gene signature could stratify patient-  
95 derived glioblastoma cell cultures into three clusters, of which two were further investigated  
96 and found to be functionally distinct (*Jiang Y et al, Cell Rep, 2017, PMID: 28122246*). The  
97 MCO gene signature was derived from mouse GSC (mGSC) cultures of different origin, and  
98 were included in this study since we wanted to analyze the relation of developmental origin  
99 and epigenetic regulation in GSCs. Cross-species analyses of both transcriptomes and  
100 epigenomes have been performed for many cancer types to obtain a better understanding of  
101 how developmental biology contribute to cancer mechanisms (*Johnson RA et al, Nature,*  
102 *2010, PMID: 20639864; Gibson P et al, Nature, 2010; PMID: 21150899; LaFave LM, Cancer*  
103 *Cell, 2020, PMID: 32707078*), but this is, to our knowledge, the first cross-species analysis of  
104 glioblastoma ATAC-seq data. In our revised manuscript, we have tried to better explain the  
105 rationale of including the mGSCs in Introduction and Results.

106  
107 This data appears to detract from their observations in the first figure of the manuscript. The  
108 authors used cells from three different origins (used in triplicate representing 9 cell lines) and

109 performed bulk ATAC. One would predict that cells from different origins should definitely  
110 cluster well together, and what was presented in Supplementary Fig. 1C basically represents  
111 a problems using the triplicate or poor-quality reads.

112  
113 **2.3.** This is a valid and understandable comment. Based on our previous transcriptome  
114 analysis (*Jiang Y et al, Cell Rep, 2017, PMID: 28122246*) we had expected that mGSC  
115 cultures of the same cell of origin would have clustered together. We were surprised by the  
116 result but decided, based on the QC parameters, FRiP (fraction of reads in peaks), TSS  
117 enrichment, Pearson correlations etc to move forward with the data. This comment, however,  
118 by R2 instigated a closer look at the data. We then realized that there was a relation between  
119 the clusters and the FRiP values (**Response fig. 1A**). To confirm or reject our previous  
120 result, we performed new ATAC-seq analysis of all nine mGSC cultures with the Omni-ATAC  
121 method (*Corces R et al, Nat Methods, 2017, PMID: 28846090*). The data turned out to be of  
122 clearly higher quality based on multiple analyses (**Fig. 1b, c; Fig. S1a, b; Response fig.**  
123 **1B**). PCA analysis now showed clusters of the same cell of origin (**Fig. 1d; Response fig.**  
124 **1B**) and importantly, these were not connected to FRiP values (**Response fig. 1B**). Thus, we  
125 decided to replace the mGSC ATAC-seq data with the newly generated Omni-ATAC-seq  
126 data and revise the manuscript according to the new results (**Fig. 1; Fig. S1; Fig. 7; Fig. S7**)  
127 including all text connected with those figures.  
128

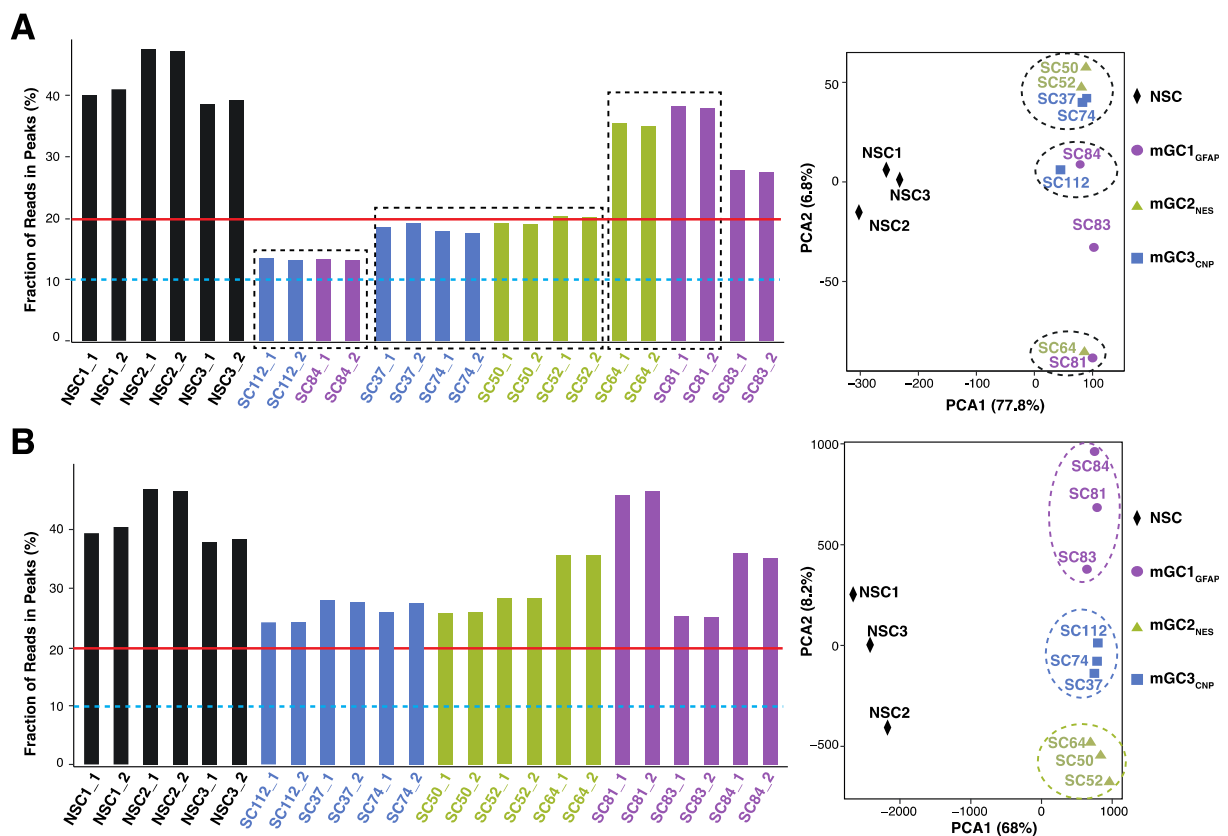

129  
130  
131 **Response figure 1.** FRiP and PCA of **A**) previous mGSC ATAC-seq data where we used a  
132 cut-off of 10% (dashed blue line) for FRiP, and **B**) new mGSC Omni-ATAC-seq data where  
133 we used a cut-off of 20% (red line) for FRiP.  
134

135 While it is totally understandable since it's from different mice and only 3 in each group can  
136 result in huge variation observed. The authors should either remove the outliers and increase  
137 the number in each group to see if the PCA clustering improves. Figure as Supp1B basically  
138 shows no significant clustering between those SCXX samples by Pearson correlation, but  
139 they switch to NMF method to make it look more significant in Figure 1d.



140  
141  
142  
143  
144  
145  
146  
147  
148  
149  
150  
151  
152  
153  
154  
155  
156  
157  
158  
159  
160  
161  
162  
163  
164  
165  
166  
167  
168  
169  
170  
171  
172  
173  
174  
175  
176  
177  
178  
179  
180  
181  
182  
183  
184  
185  
186  
187  
188  
189  
190  
191  
192  
193  
194

**2.4.** The new higher quality mouse GSC Omni-ATAC-seq data produce robust cell of origin clusters.

In Figure 1C, the authors argue the peaks are specific to different origins, but in fact they are also trying to split replicates of each origin and mix them in groupings based on the NMF clustering.

**2.5.** Previous Fig. 1c has been revised based on the new Omni-ATAC-seq data and is now **Fig. 1f**. In that figure we show genome tracks of three genes (*Cdk5r1*, *Runx1*, *Kif5c*) each connected with unique ATAC peaks of the three mGSC groups (**Fig. 1e**).

Through Figures 1E and 1F is basically regarded as hacking the statistic analysis to fit their proposed model. A knowledgeable reader would say they could see a clear trend in Figure 1F between those different origins, even though they are not significant in p values, as well as shown in Figure 1E, the authors just switched some of the samples to fit it as statistically significant even though these two figure resemble each other. This is a problem in the readers view.

**2.6.** These figures have been removed from the revised manuscript since they do not represent the new mouse Omni-ATAC-seq data. We need, however, to point out that we did not move the previous data around randomly to obtain statistical significance. The previously presented two main clusters (A+B and C) were the result of three different clustering methods.

In Figure 1G the authors only displayed their new grouping to show some survival differences This then questions how does one explain about the difference survival analysis of the origins then? That too is also likely different and maybe more significant than the authors original intent.

**2.7.** These figures have been removed from the revised manuscript because they do not represent the new data. Survival analyses of cell-of-origin groups, both with regard to primary (injecting RCAS virus) and secondary (injecting mGSCs) orthotopic tumor development, have been investigated (*Jiang Y et al, Cell Rep, 2017, PMID: 28122246*), and were for both significantly different comparing mGC1<sub>GFAP</sub> VS mGC2<sub>NES</sub> or mGC3<sub>CNP</sub>, but not between mGC2<sub>NES</sub> and mGC3<sub>CNP</sub>.

Found in Figure 1G are TFs the authors selected from Figure 1i, which is presumed to yield a difference in binding judging from the heatmap, but their plot showed quite the opposite. Most knowledgeable readers would not regard these binding differently as this is acknowledged merely by the insignificant p values.

**2.8.** Here we believe that R2 is referring to previous FigS1G which showed footprint analysis of TF binding. Correctly noted, that figure showed both significant (SLUG, SIX2, SIX4, TWIST,  $p < 0.05$ ) and non-significant (NEUROD1, BRN2) footprints but unfortunately the legend for this panel was inaccurate which we apologize for.

In the revised manuscript we have omitted all results from footprint analysis using mouse data since we have realized that this analysis requires a sequencing depth of at least 200 million reads (*Schep A et al, Genome Res, 2015, PMID: 26314830*) which we do not obtain with our Omni-ATAC data.

3) For addressing the human analysis, the number of samples used and data itself are truly valuable, and capturing brain tissue is not an easy task, so there is strong appreciation for what was needed for them to generate those datasets, the QC looks OK, but this too still

195 widely varies between samples used. This is understandable since patient variability and their  
196 collecting at different times by different personnel may represent the inconsistencies in some  
197 of the QC standards. The variation in TSS enrichment and Frip scores would lead to the wide  
198 variation in percent of promoter and enhancer peaks, where this is likely due to their  
199 technical inconsistencies with this difficult tissue type, but this aspect should not be listed as  
200 a biological difference and the focus in Figure 3.

201

202 **2.9.** We think that R2 refers to previous and current **Fig. 2** here where we display different  
203 types of analyses of the ATAC-seq data across 60 patient-derived GSC cultures. Our  
204 interpretation of the above comment is that R2 thinks that the heterogeneity displayed across  
205 GSC cultures is due to technical bias and not a reflection of biology. To address that we have  
206 divided our response in three parts:

207

208 **i) Samples**

209 We have used patient-derived glioblastoma stem cell cultures and not glioblastoma tissue.  
210 This information about the samples was unfortunately absent in the Methods section of the  
211 first submission and we apologize for that. The information has been included in the revised  
212 manuscript under Methods.

213

214 We agree that tissue would have been much more difficult to analyze and probably would  
215 have produced a larger variability, even between samples of the same patient because of  
216 intra-tumor heterogeneity. Furthermore, the inter-patient heterogeneity would have been  
217 affected not only by tumor cells but also by stromal cells, and also by tissue handling,  
218 storage and preparation at different time points.

219

220 GSC cultures, however, lack stromal cells and were maintained and harvested under the  
221 same conditions by a few people with extensive experience of maintaining and handling  
222 these cultures. This has in our mind minimized the technical bias between samples.

223

224 **ii) ATAC-seq data quality**

225 In previous and current **Fig. S2**, which has not been changed in the revised manuscript, QC  
226 analyses including FRiP, TSS enrichment and Pearson correlation of technical replicates are  
227 shown and we believe, in accordance with R2's comment above ("QC looks OK"), that the  
228 human data quality is fine.

229

230 **iii) Inter-culture heterogeneity across 60 patient-derived cultures**

231 Our study presents, to our knowledge, the largest patient-derived GSC cohort that has been  
232 analyzed with ATAC-seq. We think that **Fig. 2** contributes to illustrate the inter-patient  
233 heterogeneity of our cultures, which is important since glioblastoma is well-known for being a  
234 highly inter-patient heterogeneous disease. It provides strong support for that our human  
235 data is relevant and representative to glioblastoma.

236

237 (Figure 3, panels f,g,h doesn't provide much real information). This questions the value in  
238 using this information.

239

240 **2.10.** We agree with R2 that some of these figures could be better suited in the  
241 supplementary information and have moved previous Fig. 3f to **Fig. S3f**. The purpose of this  
242 figure is to illustrate the impact of promoter versus distal regulatory element regions to define  
243 the ATAC50 clusters.

244

245 Figure 4, panels a,c,d is still question those distribution differences by ATAC peaks  
246 shown, even though called "significant" there is not much difference by eye, and this too  
247 could be due to technical variation.

248

249 **2.11.** We agree that these statistical differences are not immediately obvious to the eye. One  
250 reason is that the analyses are based on large data sets. We have re-analyzed the statistical  
251 calculations and can confirm that the previous analyses were correct. To clarify, **Fig. 4a** is  
252 not based on ATAC-seq data but on gene expression array data for the human GSC  
253 cultures.

254  
255 The authors used the same NFM clustering 50 human samples which doesn't correlate well  
256 with TCGA subtypes and mildly correlate with MCO scoring. What the authors claimed is  
257 their ATAC is yields a better predictive value and can capture sample difference that can't be  
258 found in the RNA-seq results, this is not believable based on the data presented thus far.  
259 From what we know, RNA-seq has less technical variation and should be more robust to  
260 present sample differences.

261  
262 **2.12.** Based on our arguments in **response 2.9** above we do not believe that our cluster  
263 result is a consequence of technical variation. Glioblastoma has been molecularly stratified  
264 by many methods of which transcriptome and methylome have been most frequently used  
265 (*Brennan et al, Cancer Cell, 2013, PMID: 24120142; Ceccarelli et al, Cell, 2016, PMID:*  
266 *26824661*). They have shown some but far from complete overlap. In a very recent study an  
267 integrated molecular analysis of 99 glioblastoma tumors was presented based on ten  
268 different analyses, including genomics, transcriptomics, methylomics, proteomics, lipidomics  
269 and metabolomics (*Wang et al, Cancer Cell, 2021, PMID: 33577785*). This displayed some  
270 overlap but also very different clusters between the different data sets.

271  
272 The fact that our ATAC-seq data does not reproduce the clusters of TCGA subtypes goes  
273 well in line with the above and with a recently published ATAC-seq paper (*Guilhamon P et al,*  
274 *eLife, 2021, PMID: 33427645*) that was also cited in the original manuscript.

275  
276 Whatever marks survival, whether through sphere growth or differences in drug response,  
277 this reader believes you can find a similar trend using any other random grouping method  
278 that wouldn't carry any significant biological meaning. The way the authors are trying data  
279 mining with the data shown that doesn't not cluster well with real subtypes is problematic. If  
280 their 50 patients NMF clusters matches poorly with TCGA data, then this too is a problem.  
281 The authors are effectively claiming their datasets are better predictor than all the TCGA data  
282 combined. If by comparison the authors would need much more experimental and clinical  
283 data to back up their claims for the groupings shown.

284  
285 **2.14.** Continuing where we left in **response 2.13**, we do not find it problematic or surprising  
286 that the ATAC clusters do not agree with the TCGA subtypes. In our view the glioblastoma  
287 field has for a number of years been moving away from the TCGA subtypes. One reason  
288 being that they have not proven clinically informative and were for example not integrated in  
289 the revised 2016 WHO classification of glioblastoma, as opposed to for example the  
290 molecular classification of medulloblastoma (*Louis DN et al, Acta Neuropathol, 2016, PMID:*  
291 *27157931*). Another being that the expanded knowledge from single cell RNA-seq has  
292 shown that glioblastoma cells are highly diverse and dynamic and occur in different states  
293 believed to be developmentally dictated (*Neftel C et al, Cell, 2019, PMID: 31327527;*  
294 *Richards LM et al, Nat Can, 2021*).

295  
296 Furthermore, we need to stress that we have not performed data mining. We have simply  
297 used the ATAC50 groups obtained from the NMF cluster analysis when analyzing the  
298 functional data in previous and current **Fig. 5**. However, this comment from R2 highlighted  
299 the usefulness to present the same data grouped by TCGA subtypes as a reference to  
300 ATAC50 (**Fig. 5; Fig. 6a**). These analyses have been included in the revised manuscript as  
301 **Fig. S6** and **Fig. 6b**. When comparing the two classifications we find that ATAC50 is superior  
302 to TCGA at predicting self-renewal, invasion, drug response and tumorigenicity compared  
303 with TCGA subtypes.

304  
305 Also, as pointed out by R2, the study would gain from more clinical data so we decided to  
306 include all patients and use the ATAC60 clusters (which are highly similar when comparing to  
307 ATAC50) in the survival analysis. By doing so we captured a significant survival difference  
308 between ATAC60 C2 and C3 patients (**Fig. 6f**) which is particularly interesting since these  
309 two clusters are the most similar, both in terms of molecular and functional data.

310  
311 A reader would have argued that the authors should have focused more on the MCO score  
312 correlation and strengthen a story around that concept, where at the very minimum this  
313 would at least show readers that ATAC-seq data can be used to evaluate/correlate with MCO  
314 and find strong biological relationships more effectively, at least some of the TF activity in  
315 Figure 4h does look difference, or do a integrate RNA and ATAC analysis using MCO  
316 grouped RNA-data with their ATAC data and see how the different MCO group glioblastoma  
317 regulome works, that would be more interesting than those promoter and enhancer  
318 percentage QC and correlation analysis.

319  
320 **2.15.** We think that this comment is relevant and interesting. We had previously showed with  
321 transcriptome analysis that the mGSC cultures of different origin clustered with either  
322 proneural (mGC1<sub>GFAP</sub>, mGC3<sub>CNP</sub>) or mesenchymal (mGC2<sub>NES</sub>) TCGA classified glioblastomas  
323 (*Jiang Y et al, Cell Rep, 2017, PMID: 28122246*). With the new mouse ATAC-data we could  
324 produce the same cell of origin groups (**Fig. 1d**). Analyses of annotated genes (**Fig. 1e**) and  
325 enriched TF motifs of unique ATAC peaks for each mGSC group (**Fig 1g; Fig. S1g-i**)  
326 sustained this relationship. We then performed a cross-species analysis of significantly  
327 enriched TF motifs of each mGSC group (**Fig. S1g-i**) with all significant TF motifs of ATAC50  
328 cluster-unique ATAC peaks (**Fig. S5b**). We found a positive correlation for a number of TFs  
329 (**Fig. S7a**) and this corroborated the alignment of mGSC groups along a proneural to  
330 mesenchymal axis and a relationship between mGC1<sub>GFAP</sub> and ATAC50 C1, mGC3<sub>CNP</sub> and  
331 ATAC50 C3, and mGC2<sub>NES</sub> and ATAC50 C2, strongly proposing an important role of  
332 neurodevelopmental regulation of glioblastoma.

333  
334 In addition, we showed already in the previous version of the manuscript (**Fig. 7**) a cross-  
335 species analysis of mouse and human ATAC data where we compared MCO and ATAC50  
336 clusters. This figure remains in the revised version and has been updated with the new  
337 mouse ATAC-seq data in **Fig. 7d-e**. The take-home message is that there is a considerable  
338 overlap of the MCO and ATAC50 classifications (**Fig. 7a**), which is not dictated by analyzing  
339 ATAC peaks of promoter regions (**Fig. 7b**) or distal regulatory element regions (**Fig. 7c**) of  
340 MCO genes. However, using the unique mouse ATAC peaks of the new Omni-ATAC data  
341 (**Fig. 1e**) and converting these, through two steps of peaks-to-genes analyses, to human  
342 ATAC peaks, could with higher precision than MCO classification predict the ATAC50  
343 clusters (**Fig. 7d**). Analyzing the enriched TF motifs of the mouse (**Fig. 7e**) and human (**Fig.**  
344 **7f**) ATAC peaks generated in **Fig. 7d** showed a 90% overlap in the top-10 TFs, which  
345 support the existence of a species-conserved developmental regulation of glioblastoma.

346  
347 Overall evaluation is that the authors would at the very least need a major revision and to  
348 rethink about what and how they want to analyze this truly valuable dataset. What they are  
349 claiming now remains arbitrary and is weak without further biological and clinical data to back  
350 up their findings and observations.

351  
352 **2.16.** We have very carefully considered all comments from R2 and have used them as a  
353 basis to revise our manuscript. With our unique mouse and human data sets and cross-  
354 species approach we present a novel functional stratification that can also predict patient  
355 survival. The cross-species analysis support that the clusters are driven by species-  
356 conserved, neurodevelopmental mechanisms. We hope that our findings will provide  
357 stepping stones for further investigations to find targetable mechanisms in these or even  
358 more refined subsets of glioblastoma.

359 **Reviewer #3, expert in glioblastoma stem cells (Remarks to the Author):**  
360

361 We thank R3 for relevant and constructive comments. We have tried our best to address and  
362 respond to them and have revised the manuscript accordingly.  
363

364 In the manuscript 'Conserved cell-lineage controlled epigenetic regulation in human and  
365 mouse glioblastoma stem cells determines functionally distinct subgroups', Lu et al. describe  
366 a novel approach for classifying GSC cultures based on transposase-accessible chromatin  
367 distribution. They identified three independent ATAC-seq clusters in 9 murine and 60 human  
368 GSC cultures that were different compared to gene expression-driven approaches. In their  
369 mouse model, they found functional differences in sphere-forming capacity, in vivo  
370 aggressiveness, drug response, and transcription factor motifs in the ATACs. They further  
371 went on performing similar experiments with human GSC cultures. The sequences were  
372 predominantly DREs in both species. Also, in the human system, they report functional  
373 differences between the clusters in terms of GSC clonogenicity and drug response. The  
374 human ATAC-seq clusters overlapped with the MCO stratification better when compared to  
375 the murine GSCs.  
376 Importantly, individuals belonging to two clusters showed significantly different survival in a  
377 small cohort of patients. Finally, they analyzed the TF motifs in the murine and human GSC  
378 ATAC-seq samples and found a significant overlap of these motifs.  
379  
380

381 The manuscript is well written and describes an in-depth analysis of ATAC-seq data obtained  
382 from a big collection of GSC cultures and shows that the patients can be clearly divided into  
383 well-defined clusters with this method. However, it is a retrospective study with few  
384 biologically functional data. Thus, the practical value of this approach in the classification of  
385 GB over the current gene expression-driven methods is not entirely evident.  
386

387 **3.1.** We agree with R3 that our findings will not result in any changes in clinical practice of  
388 glioblastoma patients. Our study is an attempt to understand the underpinnings of  
389 developmental regulation of glioblastoma and our findings thus far support that chromatin-  
390 accessibility is superior to gene expression in predicting functional responses of glioblastoma  
391 cells and that these responses seem to be neurodevelopmentally regulated and controlled by  
392 distal rather than promoter regions. Continued studies will be necessary to understand the  
393 underlying mechanisms, which we believe are outside the scope of this investigation.  
394

395 However, we would like to argue that the practical (clinical) value of TCGA subtypes or any  
396 other molecularly-based glioblastoma classification have not proven clinically useful as yet  
397 although some have been around for a decade or more. This proposes that other molecular  
398 approaches are needed, such as for example ATAC-seq.  
399

400 In addition, as a consequence when responding to comment 4) below, we have in the  
401 revised manuscript included a survival analysis of all glioblastoma patients using the  
402 ATAC60 classification, which interestingly produced a significant difference between patients  
403 of ATAC60 C2 and C3 (**Fig. 6f**).  
404

405 Major points:  
406

407 1) In the mouse model (figure 1), the authors use ATAC-seq to divide the GSC cultures into  
408 three distinct and clearly separated clusters. Then they use this scheme to perform their first  
409 functional tests (e-h) to later unite clusters A and B in Figures i and j. This seems a bit forced.  
410 If the authors suggest ATAC-seq as the basis for grouping the GSC cultures and three clear  
411 ATAC-seq clusters were identified, the differences within these three clusters should be  
412 analyzed. Given the investigation's retrospective nature, this grouping should not be changed

413 depending on the experimental question to be answered.

414

415 **3.2.** This is a valid and understandable comment which was raised also by R2. Because of  
416 this we scrutinized the previous mouse ATAC data and realized that there were problems  
417 with quality and variability among the mouse GSC (mGSC) samples. Please, see **Response**  
418 **2.3** and **Response figure 1** above for more detailed information, but in summary, we  
419 performed new ATAC-seq analysis of the nine mGSC cultures which produced data of higher  
420 quality and a PCA separation into cell of origin groups, in line with the previous  
421 transcriptome-based PCA (*Jiang Y et al, Cell Rep, 2017, PMID: 28122246*). Because of the  
422 significantly higher quality of the new data we decided to use that instead and as a  
423 consequence all results that included mouse ATAC data were revised (**Fig. 1; Fig. S1; Fig.**  
424 **7; Fig. S7**) and connected texts edited in the revised manuscript.

425

426 Regarding the previous mouse ATAC data we would still like to stress, to remove any  
427 suspicions about data mining, that what we showed was the result of three different cluster  
428 methods: NMF (**previous Fig. 1d**) and hierarchical clustering (**previous Fig. S1d**) identified  
429 the same three clusters (A: SC64, SC81, SC83; B: SC84, SC112; C: SC37, SC50, SC52,  
430 SC74), while PCA (**previous Fig. S1c**) produced a slightly different result where one culture  
431 (SC83) moved from cluster A to cluster B.

432

433 2) In the sphere-forming assay (figure 1e and f), the behavior of the murine GSC cultures  
434 grouped by MCO and ATAC-seq are compared. The analyses show only differences for the  
435 ATAC-seq clusters. The authors describe that the system of murine GSCs was published  
436 before (*Cell Reports* 18, 977–990, January 24, 2017). How can it be explained that a similar  
437 analysis done in the cited paper showed highly significant differences between mGC1(GFAP)  
438 and mGC2(NES) or mGC3(CNP), while the new analyses did not?

439

440 **3.3.** This is a highly relevant question. Before answering it we would like to point out that with  
441 the new mouse ATAC data that produced cell of origin groups we did not think that this  
442 analysis was important and have removed it from the revised manuscript.

443

444 To the explanation: In *Jiang Y et al, Cell Rep, 2017* the primary spheres were derived from  
445 freshly dissociated mouse glioblastoma tissues (*Jiang Y et al, Figure 3A-C*), and secondary  
446 spheres were derived from the primary spheres (*Jiang Y et al, Figure 3D*). Thus, these  
447 analyses were done on acute mouse glioblastoma samples. The analysis showed that  
448 mGC<sub>2NES</sub> and mGC<sub>3CNP</sub> cells could not be maintained as spheres, so all subsequent  
449 analyses of these cells were performed on adherent cultures. In the previous manuscript (*Lu*  
450 *X et al*) the sphere assay (**previous Fig. 1e, f**) was performed on adherent cell cultures  
451 below passage 13. This result would be more comparable to the ELDA result (*Jiang Y et al,*  
452 *Figure 3E*), where there was a low significant difference between mGC1<sub>GFAP</sub> and mGC2<sub>NES</sub> or  
453 mGC3<sub>CNP</sub>. Although not significant in previous *Lu X et al*, there was still the same trend.

454

455 3) Critics concerning data selection apply to the data obtained for the human GSC samples.  
456 In figure 2, the authors describe the identification of robust clusters with 60 GSC samples  
457 (ATAC60). It is not entirely clear why they remove 10 samples for further analyses. In the  
458 text, this procedure is explained by the lack of genetic data for the 10 lacking samples but  
459 with such a strong bioinformatic background these analyses should be possible and done.

460

461 **3.4.** We completely understand this critique. We did consider to perform RNA-seq analysis  
462 on all 60 samples so that we would have complete gene expression and ATAC-seq data for  
463 all 60 cultures, but the honest reality is that we have limited grants and needed to prioritize  
464 which analyses to perform. The strongest argument for settling with 50 human GSC (hGSC)  
465 samples in most of the analyses (those where we wished to relate the data to MCO and  
466 TCGA) was because the clustering was so robust between ATAC50 and ATAC60, where  
467 only 3 of 50 cultures changed cluster (U3013MG: ATAC60-C2, ATAC50-C1; U3060MG:

468 ATAC60-C3, ATAC50-C2; U3198MG: ATAC60-C3, ATAC50-C1). This made us decide to  
469 use the available mGSC array data and prioritize other analyses.

470

471 4) While the xenograft data in figure 6 is convincingly showing that mice injected with human  
472 GSCs belonging to different ATAC-seq clusters have different survival rates, the patient data  
473 is not so strong. This may be at least partially due to the low number of patients. It may be  
474 helpful to include the patients for the ATAC60 panel to strengthen the significance (this could  
475 even be done without further information concerning the gene expression profiling).  
476 Especially because the different survival between two clusters is also underlined in the  
477 abstract.

478

479 **3.5.** This is an excellent suggestion! We performed survival analysis of all patients and used  
480 the ATAC60 clusters which showed a significant difference between C2 and C3 patients  
481 (**Fig. 6f**). This is especially interesting since these two clusters are the most similar, both  
482 molecularly and functionally.

483

484 5) The reviewer has not fully understood the discrepancy of the temozolomide sensitivity  
485 measured in Figures 6f and 5 e-g. If these differences are too subtle to be detected in AUC  
486 analyses, it may be enough to explain the discrepancies for the survival in the mouse model  
487 and the patients. The authors may test their hypothesis in vivo for some of their cultures to  
488 better mimic the patients' situation.

489

490 **3.6.** In previous and current **Fig. 5e-g** we show pairwise comparisons of areas under the  
491 dose-response curves (AUC) for each drug tested. In **previous Fig. 6f** we showed the actual  
492 dose-response curves for each cluster for temozolomide (that are the basis of the analysis in  
493 Fig. 5e-g). Although TMZ AUC values for the three clusters were not significantly different,  
494 viability at individual doses in the dose-response curve can still be.

495

496 In the previous manuscript we showed Fig. 6f in support of our hypothesis that the improved  
497 survival of C3 patients could be due to a better response to treatment. However, we have  
498 decided to omit this figure in the revised manuscript because the concentrations that  
499 produced the significant differences (62-500 $\mu$ M) in the cells were vastly higher than the  
500 predicted concentration of 15-35 $\mu$ M in a TMZ treated patient tumor (*Strobel et al,*  
501 *Biomedicines, 2019*).

502

503 6) The finding that murine and human GSC ATAC clusters are largely overlapping is very  
504 interesting but may be biased by the growth conditions. The GSC cultures are established  
505 and kept in defined media with dominant growth factors (FGF2 and EGF). These could lead  
506 to the activation of selected signaling pathways in both murine and human GSCs that, in  
507 turn, may result in the activation of similar transcription factor patterns. This should be  
508 investigated carefully because TFs of the AP1 family are downstream substrates of MAP  
509 kinases that are known to be strongly activated by growth factor signaling. Thus, the authors  
510 may control if the culture conditions influence the ATAC-seq data.

511

512 **3.7.** This is a highly appropriate reasoning and when addressing it we realized that  
513 information about both mouse and hGSC cultures was absent from Methods. We do  
514 apologize for this and have added this crucial information in the revised version.

515

516 To respond to the comment, it is correct that the patient-derived GSCs have been cultured in  
517 presence of exogenous EGF and FGF2. However, our mGSC cultures have from  
518 explantation and throughout the project always been cultured in absence of any added  
519 growth factors. We found, a decade ago, that if EGF and FGF2 were added to the media the  
520 mGSC cultures were overgrown by normal NSCs (*Jiang Y et al, Neoplasia, 2011, PMID:*  
521 *21677873*).

522  
523  
524  
525  
526  
527  
528  
529  
530  
531  
532  
533  
534  
535  
536  
537  
538  
539  
540  
541  
542  
543  
544  
545  
546  
547

Minor points:

1) From the M+M part, it is not clear how the sphere formation assay was done. Were the primary spheres established from in vitro cultures or from freshly dissociated xenografts? If they were established from in vitro cultures (which could explain the identical rates of primary, secondary, and tertiary spheres), it is a bit misleading to describe them as primary spheres. In this case, it would be better to rate it as in vitro proliferation.

**3.8.** We are sorry for the lack of information. All sphere assays were performed on established cultures below passage 13 for mouse and below passage 20 for human cells.

2) The same question applies to the ELDA and the proliferation analyses. Were the cells from freshly dissociated tumors or from GSC in vitro cultures?

**3.9.** Again, sorry for the lack of information. ELDA and proliferation have been performed on established cultures below passage 20. We have clarified this in Methods and added passage numbers.

3) For the survival analyses in figure 6a, the mice were inoculated with different numbers of cells. Although this becomes evident from the supplementary table, it should be clearly stated in the text.

**3.10.** Excellent point. We have clarified that in legends for **Fig. 6a**.



## Reviewers' Comments:

### Reviewer #2:

#### Remarks to the Author:

The manuscript by Lu et al. entitled, "cell-lineage controlled epigenetic regulation in glioblastoma stem cells determines functionally distinct subgroups and predicts patient survival" appears to have been adequately revised to an acceptable degree. However, some concerns and issues remain as noted below.

Even though this reviewer remains a little bothered by the formaldehyde crosslinking steps used, the authors do reason that they checked all the QC to make sure the read quality was assured. As well, the authors did re-generate and repeat the mouse ATAC Seq studies again and indicates that the quality is better this time.

The authors were responsive and removed the figures confusing to readers from the previous version and have added new better quality figures thereby this further clarifies some of the ambiguous data described previously.

While the significance of human data still needs more exploration to make more profound conclusions, this reviewer understands the limitations in acquiring and substantiating the human data. The authors do provide better mouse data and therefore understood why the authors emphasized the mouse xenograft data and how human and mice -ATAC Seq might become more highly correlated to better bridge mouse and human models and some of the mouse functional data to strengthen the analysis.

#### Minor questions-

In Fig. 4 the authors display the box plots (panels a, c, and d) based on the heatmap in panel b for C1, 2, &3 against GBM tumor types. However, it appears the degree of change ( $\Delta$ s) are not so dramatic, despite the statistical significance noted. A more nuance explanation would help the reader appreciate why this maybe the case, especially for panels c and d.

Is it possibly due to patient variance, data quality, source of samples and sampling preparations, etc.? Moreover, this questions some of the correlations presented in panel g, or lack thereof, made from individual TF footprints noted in panels h. It appears that only JUNB and FOSL2 are the only ones relevant and this should be pointed out clearly to the reader. Nonetheless, these are minor points.

Overall, the changes have certainly strengthen the manuscript and believe it provides stronger impact from the previous version.

### Reviewer #4:

#### Remarks to the Author:

This is an interesting study, which performs a cross-species analysis from a large number of patient-derived glioblastoma stem cell (GSC) cultures and mouse GSC cultures with genetically defined cell-of-origin, and discovers a small but significant developmental cell-of-origin ATAC-seq signature in human GBM, with potential prognostic significance. The revised manuscript addresses many of the reviewers' comments and shows improved technical replicates in mouse ATAC-seq GSC data related to cell-of-origin, which bolsters the premise of the study and its conclusions. Furthermore, the re-analysis now demonstrates a significant survival signature within ATACseq60 C2 and C3 clusters, using retroactive patient survival data, which corroborates the authors' prior mouse xenograft data, and serves as an important finding to be explored in future studies for molecularly-based classification of GBM using

ATAC-seq data. Many of reviewer 3's concerns have been satisfactorily addressed with this new analysis. However, some of them were not addressed fully and continue to pose concern. As requested, below I provide my itemized assessment of the authors' response to reviewer 3's critiques.

### 3.1 (addressed)

The authors now show a survival analysis using human GBM patient survival data, from whom hGSCs were derived, using ATAC60 classification (~to ATAC50 but containing 10 more patients), which allowed them to detect significant difference in patient survival within the C2 and C3 cluster signature. This is a nice complement to the already existent orthotopic xenograft data in Figure 6, which shows significant survival difference stratification based on ATAC50 and ATAC60 C2 vs. C3 cluster signatures.

### 3.2 (addressed, needs clarification)

The new mouse ATAC-seq data analysis using Omni-ATAC-seq shows robust technical replicate clustering on PCA and acceptable FriPs. One important note – the authors did not clearly mention whether they also re-analyzed their human hGSC ATAC-seq data using Omni-ATAC-seq; this should be clarified in the text beyond simply adding the reference #34. As the data is being compared, both human and mouse ATAC-seq analyses should be performed using the same pipeline.

### 3.3 (remaining concern)

The explanation as to the differences between the published analysis and the previous data shown is logical, but it raises concerns about the effect of passage number and culture conditions, and whether the uncovered biomarkers are broadly clinically relevant. At the very least, the authors should include passage number and culture conditions for all their hGSC cell lines in Data Table 1, and use these as covariates in additional survival analyses.

### 3.4 (remaining concern)

Given that the authors end up finding survival benefit with ATAC60, but not with ATAC50, Reviewer3's critique about data selection is even more relevant. I agree with reviewer 3 that the lacking genetic analyses should be done and ATAC60 should be explored in parallel to ATAC50. Or, since ATAC50 and ATAC60 are so similar, they can show only analyses performed using the clinically-relevant ATAC60 signature.

### 3.5 (addressed)

This has been satisfactorily addressed, see 3.1

### 3.6 (remaining concern)

The authors did not attempt to test their hypothesis regarding TMZ sensitivity *in vivo*, as reviewer 3 had suggested, and their explanation for now omitting Figure 6f is not sufficiently well justified.

### 3.7 (addressed)

The authors have clarified that mouse GSCs are not cultured using EGF and FGF2. While it is still possible that some of their findings are biased by growth conditions, since this study is largely cell culture-based, further analysis of TFs feels beyond the scope of their study.

3.8 (addressed, needs clarification)

The authors have clarified the passage numbers for human GSCs as less than 20 passages, which some researchers consider to still recapitulate primary GBM biology and deem as patient-derived "primary" cell culture (especially if maintained within serum-free NB conditions, PMID: 16697959) while others suggest may already be considered "established" (PMID: 30894629). Since both the mouse and human GSCs were grown at passage greater than 10, comparison is justified. Of note, the study would have been more impactful in regards to true cell of origin, if both mouse and hGSC were compared at early passage (less than 5), and, even more so, in acutely dissociated conditions. As suggested in other comments, including the actual passage used for each line, and analysis of correlation between cell or origin score to extent of passaging, would be insightful, and could further address some of reviewer 3's concerns.

3.9 (addressed)

Satisfactory clarifications have been made.

3.10 (addressed)

Satisfactory clarifications have been made.

## REVIEWER COMMENTS

We thank both reviewers for their constructive comments to further improve our manuscript. We were glad to see that most were clarified in the previous revision and have addressed the remaining concerns below, point by point.

### Reviewer #2 (Remarks to the Author):

The manuscript by Lu et al. entitled, "cell-lineage controlled epigenetic regulation in glioblastoma stem cells determines functionally distinct subgroups and predicts patient survival" appears to have been adequately revised to an acceptable degree. However, some concerns and issues remain as noted below.

Even though this reviewer remains a little bothered by the formaldehyde crosslinking steps used, the authors do reason that they checked all the QC to make sure the read quality was assured. As well, the authors did re-generate and repeat the mouse ATAC Seq studies again and indicates that the quality is better this time.

The authors were responsive and removed the figures confusing to readers from the previous version and have added new better quality figures thereby this further clarifies some of the ambiguous data described previously.

While the significance of human data still needs more exploration to make more profound conclusions, this reviewer understands the limitations in acquiring and substantiating the human data. The authors do provide better mouse data and therefore understood why the authors emphasized the mouse xenograft data and how human and mice -ATAC Seq might become more highly correlated to better bridge mouse and human models and some of the mouse functional data to strengthen the analysis

### Minor questions-

In Fig. 4 the authors display the box plots (panels a, c, and d) based on the heatmap in panel b for C1, 2, &3 against GBM tumor types. However, it appears the degree of change ( $\Delta$ s) are not so dramatic, despite the statistical significance noted. **A more nuance explanation would help the reader appreciate why this maybe the case, especially for panels c and d. Is it possibly due to patient variance, data quality, source of samples and sampling preparations, etc.?**

**Response R2 - 1.** The point is well taken. In the revised manuscript, we have added a sentence in conjunction with **Fig. 4a, c, d** explaining the overlapping box plots, lines 250-252: "*Although the differences between ATAC50 groups in most of the comparisons in Fig. 4a, c, d were statistically significant the box plots were still highly overlapping reflecting the extensive intertumor heterogeneity of GBM.*"

Moreover, this questions some of the correlations presented in panel g, or lack thereof, made from individual TF footprints noted in panels h. It appears that only JUNB and FOSL2 are the only ones relevant and this should be pointed out clearly to the reader.

**Response R2 - 2.** This is a good point. All TF footprints in **Fig. 4h** are significant ( $p < 0.05$ ) and exact p-values have now been added to each revised graph. In addition, we have also changed the order of the graphs in Fig. 4g-h to improve readability, so that the same TFs are on top of each other.

Nonetheless, these are minor points. Overall, the changes have certainly strengthen the manuscript and believe it provides stronger impact from the previous version.

#### Reviewer #4 (Remarks to the Author):

This is an interesting study, which performs a cross-species analysis from a large number of patient-derived glioblastoma stem cell (GSC) cultures and mouse GSC cultures with genetically defined cell-of-origin, and discovers a small but significant developmental cell-of-origin ATAC-seq signature in human GBM, with potential prognostic significance. The revised manuscript addresses many of the reviewers' comments and shows improved technical replicates in mouse ATAC-seq GSC data related to cell-of-origin, which bolsters the premise of the study and its conclusions. Furthermore, the re-analysis now demonstrates a significant survival signature within ATACseq60 C2 and C3 clusters, using retroactive patient survival data, which corroborates the authors' prior mouse xenograft data, and serves as an important finding to be explored in future studies for molecularly-based classification of GBM using ATAC-seq data. Many of reviewer 3's concerns have been satisfactorily addressed with this new analysis. However, some of them were not addressed fully and continue to pose concern. As requested, below I provide my itemized assessment of the authors' response to reviewer 3's critiques.

#### 3.1 (addressed)

The authors now show a survival analysis using human GBM patient survival data, from whom hGSC were derived, using ATAC60 classification (~to ATAC50 but containing 10 more patients), which allowed them to detect significant difference in patient survival within the C2 and C3 cluster signature. This is a nice complement to the already existent orthotopic xenograft data in Figure 6, which shows significant survival difference stratification based on ATAC50 and ATAC60 C2 vs. C3 cluster signatures.

#### 3.2 (addressed, needs clarification)

The new mouse ATAC-seq data analysis using Omni-ATAC-seq shows robust technical replicate clustering on PCA and acceptable FriPs. One important note – **the authors did not clearly mention whether they also re-analyzed their human hGSC ATAC-seq data using Omni-ATAC-seq; this should be clarified in the text beyond simply adding the reference #34.** As the data is being compared, **both human and mouse ATAC-seq analyses should be performed using the same pipeline.**

**Response R4 - 3.2.** Thank you for pointing this out. We realized that we had not described the ATAC-seq methods and data analyses clearly enough in Methods. We have now clarified this in lines 673-686 and 703. The essence of the additional information is that Omni-ATAC-seq was only used for mouse GSCs (since the human data already were of high enough quality), and the same bioinformatics pipeline was used for both mouse and human ATAC-seq data.

#### 3.3 (remaining concern)

The explanation as to the differences between the published analysis and the previous data shown is logical, but it raises concerns about the effect of passage number and culture conditions, and whether the uncovered biomarkers are broadly clinically relevant. At the very least, the authors should **include passage number and culture conditions for all their hGSC cell lines in Data Table 1, and use these as covariates in additional survival analyses.**

**Response R4 - 3.3.** This is a good point. In our revised manuscript, passage numbers and culture conditions for all cultures included in the study have been added to **Data Table 1**. We were not completely clear of how to relate the passage numbers of the hGSC cultures in

**Data Table 1** to survival. However, to further understand if passage number could have influenced our results in the functional analyses, we have compared passage numbers between the groups used in the functional analyses (**Fig. 5**, **Supplemental Fig. 6**, and new **Supplemental Fig. 7**), i.e. between ATAC50 groups (**Rebuttal Fig. 1a**), TCGA groups (**Rebuttal Fig. 1b**), and ATAC60 groups (**Rebuttal Fig. 1c**). We used one-way ANOVA comparing all three groups and t-test between pairs of groups, and could only find one significant difference in passage number between CL and MS groups in the drug response analysis (**Rebuttal Fig. 1b**). By that we feel confident that differences in passage number have not biased our results.

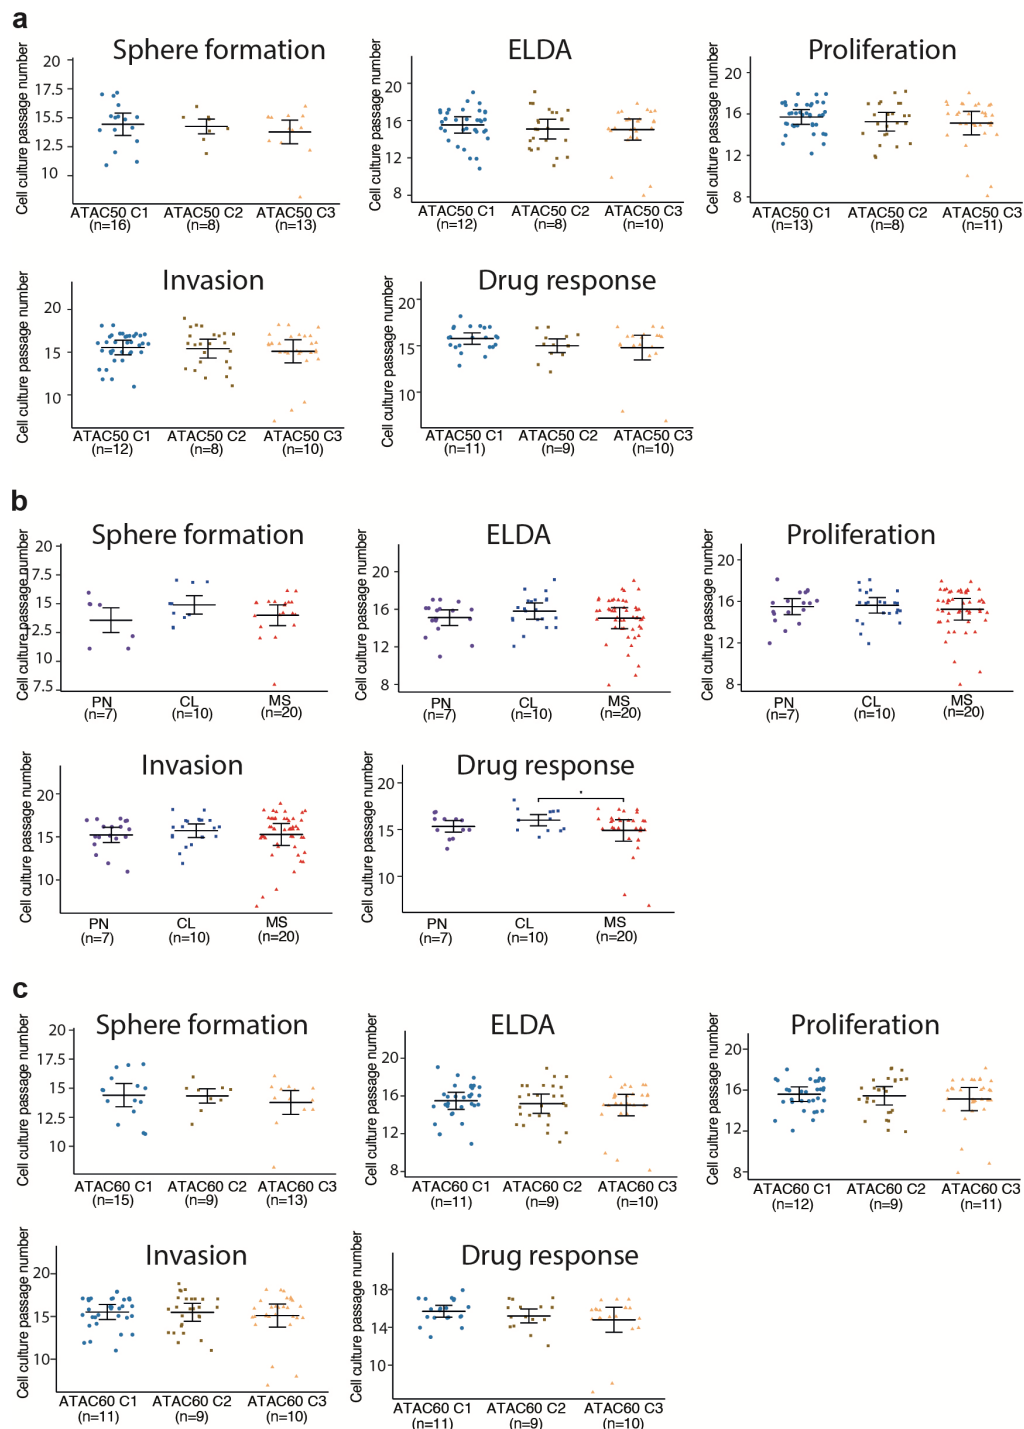

**Rebuttal Figure 1.** Comparisons of passage numbers of the cell cultures used in the different functional analyses (sphere formation, ELDA, proliferation, invasion, drug

response). One-way ANOVA and Student's t-test were performed on all graphs. (a) Groups based on ATAC50. All comparisons were non-significant. (b) Groups based on TCGA. CL vs. MS in drug response analysis was significant using t-test, \* $p=0.05$ . (c) Groups based on ATAC60. All comparisons were non-significant.

### 3.4 (remaining concern)

Given that the authors end up finding survival benefit with ATAC60, but not with ATAC50, Reviewer3's critique about data selection is even more relevant. I agree with reviewer 3 that the lacking genetic analyses should be done and ATAC60 should be explored in parallel to ATAC50. **Or, since ATAC50 and ATAC60 are so similar, they can show only analyses performed using the clinically-relevant ATAC60 signature.**

**Response R4 - 3.4.** We agree that we should have analyzed the functional data using ATAC60. Thus, we reanalyzed the data from **Fig. 5** and **Fig. 6a** using ATAC60 which is presented in the new **Supplementary Fig. 7** introduced after showing patient survival of ATAC60 groups, lines 363-370. The changes from ATAC50 to ATAC60 were small:

- **Fig S7c**, C1 vs C2 changed from \*\*\*\* $p<0.0001$  to \*\*\* $p = 0.00015$ .
- **Fig S7d**, C1 vs C2 changed from \* $p=0.02$  to \*\* $p=0.0034$ , and for C2 vs C3 from \* $p=0.014$  to \*\* $p=0.0051$ .
- **Fig S7f**, number of significantly more sensitive drugs in C1 vs. C3 changed from 5 to 4
- **Fig S7g**, number of significantly more sensitive drugs in C3 vs C2 changed from 4 to 2
- **Fig S7h**: higher significant difference between C2 and C3, \*\* $p=0.0062$  changed to \*\*\* $p=0.00037$

In summary, ATAC60 groups provided slightly higher significance for differences in invasion and in vivo tumorigenicity, while slightly lower for proliferation and drug response phenotype. We had added our new analysis in the main text (lines 363-370).

3.5 (addressed)

This has been satisfactory addressed, see 3.1

### 3.6 (remaining concern)

**The authors did not attempt to test their hypothesis regarding TMZ sensitivity in vivo, as reviewer 3 had suggested, and their explanation for now omitting Figure 6f is not sufficiently well justified.**

**Response R4 - 3.6.** To perform animal experiments must be ethically justified and to all extent possible preceded by supportive *in vitro* data. Here we did not think that the *in vitro* data was strong enough to initiate a treatment study since there were no significant differences in drug response at the clinically relevant concentrations which have been reported to be between 1-35 mM (Rosso L et al, *Cancer Res*, 2009 PMID: 19117994; Stepanenko AA et al, *Biomedicines*, 2019, PMID: 31783653). We do however think that one contributing factor to the survival differences between ATAC60 C2 and C3 patients may be differences in response to oncologic treatment (temozolomide and irradiation) and this is something we wish to follow up in future studies.

3.7 (addressed)

The authors have clarified that mouse GSCs are not cultured using EGF and FGF2. While it is still possible that some of their findings are biased by growth conditions, since this study is largely cell culture-based, further analysis of TFs feels beyond the scope of their study.

### 3.8 (addressed, needs clarification)

The authors have clarified the passage numbers for human GSCs as less than 20 passages, which some researchers consider to still recapitulate primary GBM biology and deem as patient-derived “primary” cell culture (especially if maintained within serum-free NB conditions, PMID: 16697959) while others suggest may already be considered “established” (PMID: 30894629). Since both the mouse and human GSCs were grown at passage greater than 10, comparison is justified. Of note, the study would have been more impactful in regards to true cell of origin, if both mouse and hGSC were compared at early passage (less than 5), and, even more so, in acutely dissociated conditions. As suggested in other comments, **including the actual passage used for each line, and analysis of correlation between cell or origin score to extent of passaging, would be insightful, and could further address some of reviewer 3’s concerns.**

**Response R4 - 3.8.** We agree with reviewer 4 that optimally we would have used similar and low passage cells for all our analyses. However, this poses a big problem when it comes to generating the numbers needed for technical and biological replicates, and was for our study with a large number of different cultures and extensive functional and phenotypic analyses not possible.

We have, per **Response R4 - 3.3**, added passage numbers for all cultures included in **Data Table 1** and also analyzed if the results could have been biased by differences in passage number but cannot find any evidence pointing to that (**Rebuttal Fig. 1**).

3.9 (addressed)

Satisfactory clarifications have been made.

3.10 (addressed)

Satisfactory clarifications have been made.



Reviewers' Comments:

Reviewer #4:

Remarks to the Author:

The authors have responded satisfactory to my remaining questions / concerns.

NCOMMS-21-05116B  
Point-by-point response

**Overview**

We thank the Reviewers for their positive feedback on our manuscript.

Reviewer #4 (Remarks to the Author):

The authors have responded satisfactory to my remaining questions / concerns.

[Thank you for your positive feedback.](#)
