# Supplementary material for: Cell-lineage controlled epigenetic regulation in glioblastoma stem cells determines functionally distinct subgroups and predicts patient survival
Source: PubMed Central journal article supplement (PMC9038925; doi:10.1038/s41467-022-29912-2), 2022-04-25
Supplement: 41467_2022_29912_MOESM3_ESM.pdf [file 41467_2022_29912_MOESM3_ESM.pdf]

**Supplementary Figures 1-8 are in the separated file.**

**Source data is in the separated file.**

**Supplementary Data 1-9 are in separate files.**

**Supplementary Data 1.** Mouse and human cell cultures used in the study.

**Supplementary Data 2.** Differential mouse GSC ATAC peaks and genes annotated to these peaks.

**Supplementary Data 3.** Significantly enriched and variable TF motifs of differential mouse GSC ATAC peaks.

**Supplementary Data 4.** Differential human GSC ATAC50 peaks and genes annotated to these peaks.

**Supplementary Data 5.** DRE ATAC peak-to-gene linkage prediction.

**Supplementary Data 6.** Significantly enriched and variable TF motifs of differential human GSC ATAC peaks.

**Supplementary Data 7.** Significantly enriched ATAC50 cluster-unique TF motifs.

**Supplementary Data 8.** AUC values of drug response analyses of human GSC cultures.

**Supplementary Data 9.** Survival of immune-deficient mice orthotopically transplanted with human GSCs.
